# Supplementary material for: Classification and Definitions of Compensatory Protective Step Strategies in Older Adults: A Scoping Review
Source: MDPI journal article supplement (doi:10.3390/jcm13020635), 2024-01-22
Supplement: s1 [file s1]

**Table S1.** Study characteristics: study design, population.

| Author and Year               | Study Design and Population                                                                                                      | Study Aim                                                                                                                         | Perturbation Method and Instrument                                                             | Compensatory Protective Step Strategies                                                                              | Variables and Measuring Instrument                                                                                                                                                                                    |
|-------------------------------|----------------------------------------------------------------------------------------------------------------------------------|-----------------------------------------------------------------------------------------------------------------------------------|------------------------------------------------------------------------------------------------|----------------------------------------------------------------------------------------------------------------------|-----------------------------------------------------------------------------------------------------------------------------------------------------------------------------------------------------------------------|
| Raffegeau et. al. (2019) [56] | Quasi-experimental.<br>n= 54; W (72±5 years) and M (72±5 years).                                                                 | Examine gender differences in the performance of adaptive locomotor tasks and evaluate potential contributing factors.            | Trip: Walking in a walkway 8 meters: forward walking, backwards walking and obstacle crossing. | -                                                                                                                    | Step width, step speed and step length. Approach distance, toe-clearance and landing distance ( <i>Motion capture technology, reflective marker and video camera</i> ).                                               |
| Wang Y. et. al. (2020)[64]    | Quasi-experimental.<br>n= 40 MW; (67.9 ±5.5 years).                                                                              | Investigate the extent to which an obstacle-induced trip paradigm in older adults could reduce trip-induced falls.                | Trip a walking in a walkway 7 meters. The obstacle of metal turns on with electromagnets.      | Lowering strategy.<br>Elevating strategy.<br>Obstacle crossing.                                                      | COM position and velocity, pre-post trip ( <i>Force platform</i> ). Toe clearance, recovery step length, trunk angle ( <i>Camera motion capture system and reflective markers</i> ).                                  |
| Wang S. et. al. (2017)[27]    | Quasi-experimental.<br>n=195 MW ;(72.3±5.3 years).                                                                               | Investigate whether the recovery foot placement would determine the slip types, the likelihood of fall, and the severity of fall. | Slip was induced by movables platforms, low-friction, in a walkway 7 meters.                   | -                                                                                                                    | Deceleration time recovery foot, step time, liftoff and touchdown foot, and trunk angle ( <i>Camera motion capture system and reflective markers</i> ). COM, hip and wrist impact velocity ( <i>Force platform</i> ). |
| Wang S. et. al. (2020)[58]    | Quasi-experimental.<br>n= 195;(72.3±5.3 years).                                                                                  | Chart a recovery rate curve for gait-slips.<br>Investigate and determine the optimal recovery zone.                               | Slip: was induced by movables platforms, low-friction, in a walkway 7 meters.                  | -                                                                                                                    | COM position and velocity ( <i>Force platform</i> ). Step length, limb support, foot touchdown, recovery foot liftoff and touchdown ( <i>Camera motion capture system and retro-reflective markers</i> ).             |
| Rogers et. al. (2021)[75]     | Randomized controlled trials.<br>n=78 MW; four group: (73.6±6.5 years), (73.7±6.3 years), (72.5±7.2 years) and (70.8±4.4 years). | Compare the effects different training prospective falls among older adults.                                                      | Waist-pull: Perturbation medial-lateral (ML) was applied by a motorized system.                | Single Lateral step.<br>Unloaded limb step (crossover step and medial-lateral step)<br>Collisions between the limbs. | Number of recovery steps, step length, step time, step speed and walking speed.<br>( <i>An instrumented walkway system</i> ).                                                                                         |

|                               |                                                                                                                                                 |                                                                                                                                                              |                                                                                                                                                                |                                                                                                                           |                                                                                                                                                                                                                                                 |
|-------------------------------|-------------------------------------------------------------------------------------------------------------------------------------------------|--------------------------------------------------------------------------------------------------------------------------------------------------------------|----------------------------------------------------------------------------------------------------------------------------------------------------------------|---------------------------------------------------------------------------------------------------------------------------|-------------------------------------------------------------------------------------------------------------------------------------------------------------------------------------------------------------------------------------------------|
| Batcir et. al.<br>(2018)[76]  | Observational.<br>n=47; OA ( $\geq 70$ years)<br>and YA (age range 20-30 years).                                                                | Valuate the inter-observer reliability and agreement of balance recovery responses, kinematic parameters of stepping, and step threshold.                    | Surface-translation: the perturbation was applied by a mechatronic device. A computer program provides unexpected surface translation in different directions. | Unloaded leg sidestep.<br>Loaded leg sidestep.<br>Cross-over step.<br>Leg collision.<br>Leg abduction.<br>Multiple steps. | Step initiation, step initiation phase, foot-contact, first recovery stepping duration, first step length, multiple-step duration, multiple-step length and COM distance ( <i>Motion capture system, video camera and reflective markers</i> ). |
| Werth et. al.<br>(2021)[29]   | Quasi-experimental.<br>n=97 MW; YA ( $24 \pm 4$ years), middle-aged ( $52 \pm 5$ years) and OA ( $72 \pm 5$ years).                             | Assess whether volitional step can discriminate between individuals with single or multiple stepping after loss of balance.                                  | Tether-release method: the perturbation was applied with a pneumatic release system.                                                                           | Single step<br>Multiple steps                                                                                             | Reaction time, swing time, maximal step velocity, step length, rate of increase in BoS foot take-off and foot touchdown. ( <i>Camera motion capture system and retroreflective marker</i> )                                                     |
| Wang S. et. al. (2019) [63]   | Quasi-experimental.<br>n=112 MW.<br>( $67.7 \pm 5.9$ years)                                                                                     | Develop a model based on healthy older adults' normal gait pattern to accurately predict fall-risk following an unexpected.                                  | Slip: was induced by movables platforms, low-friction, in a walkway 7 meters.                                                                                  | Forward Slip.                                                                                                             | Step length, step width, gait speed, COM ( <i>Retroreflective marker, camera motion capture system and force platform</i> ).<br>Angle and velocity ( <i>Retroreflective marker, camera motion capture system</i> ).                             |
| Wojcik et. al.<br>(1999)[30]  | Quasi-experimental.<br>n=20 M; YA (mean age 25 years) and OA (mean age 73.4 years).                                                             | Examine the single-step balance recovery capabilities of older women.                                                                                        | Tether-release method: the perturbation was applied with a lean-control cable.                                                                                 | <i>Forward step:</i><br>-Single step<br>-Multiple step failure                                                            | Reaction time, weight transfer, step time, step length and step velocity ( <i>Optoelectronic motion analysis system and infrared diodes</i> ).                                                                                                  |
| Batcir et. al.<br>(2020) [37] | Quasi-experimental.<br>n=83 MW; non-faller ( $79.6 \pm 5.1$ years), one-time fallers ( $78 \pm 5.5$ years) and fallers ( $78.5 \pm 4.7$ years). | Investigate the differences in balance recovery to a lateral balance loss between non-fallers, recurrent fallers, and older adults who had fallen only once. | Surface-translation: the perturbation was applied by a system of perturbation multi-directional unannounced underfoot perturbations.                           | Single step.<br>Multiple-step.<br>Loaded leg sidestep.<br>Unloaded leg sidestep.<br>Crossover step.<br>Leg abduction.     | Step initiation duration, step duration, step length, COM path displacement ( <i>Ariel Performance Analysis System, video camera and reflective markers</i> ).                                                                                  |

|                               |                                                                                                            |                                                                                                                                                              |                                                                                                                                                           |                                                                                                                              |                                                                                                                                                                                                                                                               |
|-------------------------------|------------------------------------------------------------------------------------------------------------|--------------------------------------------------------------------------------------------------------------------------------------------------------------|-----------------------------------------------------------------------------------------------------------------------------------------------------------|------------------------------------------------------------------------------------------------------------------------------|---------------------------------------------------------------------------------------------------------------------------------------------------------------------------------------------------------------------------------------------------------------|
| Crenshaw et. al. (2018)[42]   | Quasi-experimental. n=112 W; (76.6 ±7.5 years).                                                            | Quantify the relationships between established measures of fall risk and compensatory stepping thresholds in older adult women.                              | Walking a walkway 7.5meters. Trip: obstacle crossing. Disturbances with a computer-controlled treadmill.                                                  | Obstacle crossing. Anterior or posterior single-stepping. Anterior or posterior multiple-stepping.                           | Gait: gait speed, stride time, stride in double-support and step width ( <i>Retro-reflective markers, motion analysis system and video camera</i> ). Trip: Peak lateral speed COM during crossing step and crossing step ( <i>Retro-reflective markers</i> ). |
| Carbonneau et. al. (2014)[40] | Quasi-experimental. n=52 MW; YA (32.4±7.7 years), middle-aged (54.3±5.6 years) and OA (75±5.8 years).      | Determine the effects of age and loss of balance direction on the threshold of balance recovery, in younger, middle-aged and older adults.                   | Tether-release method: the perturbation was applied with a lean-control cable.                                                                            | -                                                                                                                            | Reaction time, weight transfer time, step time, mean and maximum step velocity, step length, step width and step height ( <i>Optoelectronic position sensors and markers</i> ). Before liftoff and after touchdown ( <i>Force platforms</i> ).                |
| Lockhart. et. al. (2005)[28]  | Quasi-experimental. n=42 MW; YA (22.6±2.1 years), middle-age (46.9±13.6 years) and OA (75.5±6.8 years).    | Investigate the process of initiation, detection, and recovery of inadvertent slips and falls.                                                               | Slip with vinyl tile. The vinyl tile surface was covered with motor oil to reduce the coefficient of friction.                                            | -                                                                                                                            | Step length, Step length index, heel contact velocity, velocity of the whole-body COM and friction demand. ( <i>Performance Analysis System, video camera and reflective markers</i> ).                                                                       |
| Yungher et. al. (2012)[67]    | Quasi-experimental. n=20 MW; (Mean age 72.8 years).                                                        | Measure the changes over time of protective stepping within a single session of repeated lateral perturbations in older adults.                              | Waist-pull: the perturbation was applied by a perturbation system in the right and left lateral direction.                                                | Lateral sidestep. Unloaded crossover step by front body. Unloaded crossover step by behind the body. Unloaded step medially. | Number of steps, number strategies steps, number of collisions, medial-lateral distance, onset and cessation step time, mean velocity, leg length. ( <i>Reflective markers and camera motion analysis system</i> )                                            |
| Grabiner et. al. (2012)[71]   | Randomized controlled trial. n=52 W; training group (65.9 ± 7.8 years) and control group (58.8±4.7 years). | Determine the extent to which a task-specific training protocol decreased the number of falls by middle-age and older women after a laboratory-induced trip. | Surface-translation: the perturbation was induced by a microprocessor-controlled, stepper motor-driven treadmill. Trip: the foam obstacle has a 5cm high. | -                                                                                                                            | During initial acceleration phase, during the constant velocity phase, during the deceleration phase, trunk flexion angle and velocity, and recovery step length. ( <i>Reflective markers and motion capture system</i> ).                                    |

|                                |                                                                                                                  |                                                                                                                      |                                                                                                                                                                                                    |                                                                                                       |                                                                                                                                                                                                                                                                 |
|--------------------------------|------------------------------------------------------------------------------------------------------------------|----------------------------------------------------------------------------------------------------------------------|----------------------------------------------------------------------------------------------------------------------------------------------------------------------------------------------------|-------------------------------------------------------------------------------------------------------|-----------------------------------------------------------------------------------------------------------------------------------------------------------------------------------------------------------------------------------------------------------------|
| Rogers et. al. (2001)[57]      | Quasi-experimental. n=50 MW; adults (31±7 years) and OA: non-faller (71±5 years) and faller (74± 8 years).       | Investigate whether the protective stepping for balance recovery is altered with age and history of falling.         | Waist-pull: the perturbation was applied by a motor-driven pull system.                                                                                                                            | -                                                                                                     | First-step liftoff time, step distance, step duration, COM displacement and velocity ( <i>Motion analysis system, video camera and reflective markers</i> ).                                                                                                    |
| Ochi et. al. (2014)[52]        | Quasi-experimental. n=29 W; non-faller (81.4 ± 3.4 years) and faller (82.8 ± 4.5 years).                         | Compare leg muscle activation patterns during recovery steps after a forward fall between.                           | Tether-release method: the perturbation was applied with the release of the tether.                                                                                                                | -                                                                                                     | Step length and knee angle ( <i>markers in the floor and a video camera</i> ). Lift-off phase, step phase and stance phase, onset time and time to first peak ( <i>load cell, foot switch and video data</i> ).                                                 |
| Pijnappels et. al. (2005) [55] | Quasi-experimental. n=23 MW; YA (27.1± 4.3 years) and OA (67.6±2.7 years).                                       | Investigate whether older adults react less than young adults during the primary phase of recovery after tripping.   | Trip: walking over a platform. A force plate was mounted in the platform and 21 aluminum obstacles were hidden over a total distance of 1.5 m.                                                     | Elevating strategy. Lowering strategy.                                                                | <i>Kinematic</i> : heel strike, toe-off, obstacle foot contact. <i>Time</i> : stance phase, swing phase and double support duration. <i>Clearance</i> : stride length, hip height and hip displacement. ( <i>Video camera and infrared-light markers</i> ).     |
| Okubo et. al. (2019)[73]       | Randomized controlled trial. n=44 MW; an intervention group (73.3±5.9 years) and control group (70.8±4.9 years). | A reactive balance training program with slips and trips would reduce perturbation-induced falls in older adults.    | Slip and trip: the perturbation was applied in a 10m walkway. Both perturbations were concealed. Slip was induced by a movable tile on two hidden rails. Trip were induced using by a foot sensor. | <i>Trip</i> :<br>Elevating strategy. Lowering strategy. Slip:<br>Backward stepping. Forward stepping. | <i>Gait</i> : speed, cadence and step length. <i>Trip and slip</i> : MoS, COM position, step length, step height and trunk degree. In addition, foot contact slip, slip speed and slip distance ( <i>Camera motion capture system and reflective markers</i> ). |
| Pavol et. al. (2001)[68]       | Quasi-experimental. n=79 MW; (72±5 years).                                                                       | Identify the mechanisms whereby healthy older adults fell following an induced trip.                                 | Trip: the perturbation was induced using a concealed, pneumatically driven, metal, mechanical obstacle.                                                                                            | Elevating strategy or reaching strategy. Lowering strategy.                                           | Trunk angle, hip velocity, time trip, step length, stride length, foot toe-off, time ground contact, step duration and ankle velocity ( <i>Camera motion capture system and reflective markers</i> ).                                                           |
| Bosquée et. al. (2021)[39]     | Quasi-experimental. n=44; YA (24 ± 3 years), middle-aged (53 ± 5 years) and OA (72 ± 5 years).                   | Examine the relationship between the stability recovery performance during lean-and-release task and a tripping-task | Tether-release method: the perturbation was applied by a custom-built pneumatic break and release system. Trip: the perturbation induced using a                                                   | <i>Tether-release method</i><br>Single step. Multiple steps.                                          | MoS, foot touchdown and BoS ( <i>Camera motion capture system and reflective markers</i> ).                                                                                                                                                                     |

|                           |                                                                                                                   | on a treadmill among adults.                                                                                                                                                                                                              | custom-built pneumatic perturbation system.                                                                                         |                                                                                                                                                                                            |                                                                                                                                                                      |
|---------------------------|-------------------------------------------------------------------------------------------------------------------|-------------------------------------------------------------------------------------------------------------------------------------------------------------------------------------------------------------------------------------------|-------------------------------------------------------------------------------------------------------------------------------------|--------------------------------------------------------------------------------------------------------------------------------------------------------------------------------------------|----------------------------------------------------------------------------------------------------------------------------------------------------------------------|
| Mille et. al (2013)[22]   | Quasi-experimental. n=75 MW; YA (23.5±3.2 years) and OA: non-faller (72.5±5.9 years) and faller (75.2±7.8 years). | Determine the protective stepping response evoked by different directions of externally applied waist-pull perturbations of balance and to identify the changes in stepping attributable to aging and in relation to the risk of falling. | Waist-pull: the perturbation was applied by a motor-controlled waist-pull system.                                                   | Single step or forward step.<br>Multiple steps.<br>Lateral Loaded step.<br>Lateral Unloaded step.<br>Collision step.<br>Unloaded mediolateral steps.<br>Crossover step.<br>Collision step. | Number of steps, onset time, step duration, step clearance, global step length ( <i>Camera motion analysis system, reflective markers</i> ).                         |
| Young et. al. (2013)[66]  | Quasi-experimental. n=39 MW: fallers (73.4±1.1 years) and non-fallers (74.6±1.6 years).                           | Determine how leg preference affected balance recovery strategies following a perturbation balance.                                                                                                                                       | Waist-pull: the perturbation was induced by a motor waist-pull system.                                                              | Lateral sidesteps.<br>Unloaded crossover step. or crossover step.<br>Medial sidestep.                                                                                                      | Numbers and types of steps. ( <i>Observation, camera motion capture system and reflective markers</i> ).                                                             |
| Rieger et. al (2020)[74]  | Randomized controlled trial. n=30 MW; intervention group (70.33±3.99 years) and control group (71.67±4.96 years). | Investigate the effects of a single session gait training with perturbations in AP direction on ML gait stability and assessed whether these effects are retained.                                                                        | Surface-translation: the perturbation was applied in a 3-D instrumented dual-belt treadmill.                                        | Crossover step.                                                                                                                                                                            | Step time, stance time, swing time, step length, step width trunk velocity and COM ( <i>Camera motion capture system and reflective markers</i> ).                   |
| Carty et. al (2012)[41]   | Quasi-experimental. n=151 MW. (71.6±4.6 years)                                                                    | Investigate balance recovery in the anterior-posterior direction exhibited by older adults.                                                                                                                                               | Tether-release method: the perturbation was applied through the disengagement of an electromagnet.                                  | Single step.<br>Multiple steps.                                                                                                                                                            | MoS, BoS and velocity COM ( <i>Force platform</i> ). Toe off duration and foot contact duration ( <i>Camera motion capture system, reflective markers</i> ).         |
| Graham et. al. (2015)[45] | Quasi-experimental. n=117 MW. (72±4.9 years)                                                                      | Identify the biomechanical factors that distinguish between older adults who can recover with a single step forward lean.                                                                                                                 | Tether-release method: the perturbation was applied through the disengagement of an electromagnet located in-series with the cable. | Single step.<br>Multiple steps.                                                                                                                                                            | Step length, step time, trunk angle and angular velocity at toe off ( <i>Camera motion capture system, reflective marker</i> ).<br>Foot contact ( <i>Platform</i> ). |

|                             |                                                                                                               |                                                                                                                        |                                                                                                                                                              |                                                                                                                                                               |                                                                                                                                                                                                                                           |
|-----------------------------|---------------------------------------------------------------------------------------------------------------|------------------------------------------------------------------------------------------------------------------------|--------------------------------------------------------------------------------------------------------------------------------------------------------------|---------------------------------------------------------------------------------------------------------------------------------------------------------------|-------------------------------------------------------------------------------------------------------------------------------------------------------------------------------------------------------------------------------------------|
| Mansfield et. al (2010)[72] | Randomized controlled trial. n=30 MW; intervention group (70.3±4.7 years) and control group (69.1±3.8 years). | Evaluate a perturbation-based balance training program.                                                                | Waist-pull and surface-translation: the perturbations were applied with an unpredictable system of support surface motion (motion platform) and cable pulls. | Multiple steps.<br>Lateral step.<br>Foot collisions.                                                                                                          | Frequency of multiple-step, lateral step and collisions during lateral step reactions, and step distance. <i>Reaction time (Motion capture system, video camera and reflective markers). Foot-off and foot-contact (Force platforms).</i> |
| Pavol et. al. (1999)[54]    | Quasi-experimental. n= 79 MW. (72±5 years).                                                                   | Determine the proportion of falls that resulted from trip induced during gait.                                         | Trip: the perturbation was induced using a concealed pneumatically, driven metal, mechanical obstacle.                                                       | -                                                                                                                                                             | Step time, step length, stride length, step width and average trunk flexion angle. <i>(Motion capture system and reflective markers).</i>                                                                                                 |
| Singer et. al (2015)[60]    | Quasi-experimental. n= 20; YA (25±5 years) and OA (67±6 years).                                               | Determine the age-related biomechanical differences during recovery from posterior and anterior perturbations.         | Tether-release method: the perturbation was applied through the disengagement of an electromagnet.                                                           | Single step<br>Multiple step                                                                                                                                  | Reaction time, step time, recovery time <i>(Camera motion capture system and reflective markers). Step length and peak COM velocity (Reflective markers and plate platform).</i>                                                          |
| Yang et. al. (2014)[65]     | Quasi-experimental. n= 187 MW; (71.9±5.1 years).                                                              | Evaluate the degree to which these stability measurements could predict an impending fall.                             | Slip: the perturbation was applied by a sliding device along a 7m walkway. The device consisted of two low frictions.                                        | -                                                                                                                                                             | Step length, step width and step time. <i>(Camera motion capture system and retro-reflective markers)</i>                                                                                                                                 |
| Batcir et. al. (2022)[24]   | Quasi-experimental. n= 84 MW; (79.3±5.2 years).                                                               | Explore whether different kinematic patterns and strategies occur in the first recovery single-step and multiple-step. | Surface-translation: the perturbation was applied by motor driven treadmill device. The treadmill provided a right or left unannounced surface translation.  | Single-step.<br>Multiple-step.<br>Loaded-leg sideway stepping.<br>Unloaded-leg sideway stepping.<br>Cross-over stepping.<br>Hip Abduction.<br>Leg Collisions. | Step initiation, step duration, step length, step velocity, total recovery duration, recovery step path length and total estimated COM. <i>(Motion capture system, retro-reflective markers and video camera)</i>                         |
| Luchies et. al. (1999)[48]  | Quasi-experimental. n= 24; YA (21±2.5 years) and OA (68±4.1 years).                                           | Investigate if performance on an involuntary step task was comparable to                                               | Waist-pull: the perturbation was produced using electronically released weight and cable system.                                                             | -                                                                                                                                                             | Liftoff time, landing time, time, weight transfer time, step duration, step length and step height <i>(Landmark motion, optoelectronic motion analysis system).</i>                                                                       |

|                              |                                                                                  |                                                                                                                                        |                                                                                                                                                                                                                                                  |                                                                                                                                      |                                                                                                                                                                                                                                                               |
|------------------------------|----------------------------------------------------------------------------------|----------------------------------------------------------------------------------------------------------------------------------------|--------------------------------------------------------------------------------------------------------------------------------------------------------------------------------------------------------------------------------------------------|--------------------------------------------------------------------------------------------------------------------------------------|---------------------------------------------------------------------------------------------------------------------------------------------------------------------------------------------------------------------------------------------------------------|
|                              |                                                                                  | performance on a voluntary step task.                                                                                                  |                                                                                                                                                                                                                                                  |                                                                                                                                      |                                                                                                                                                                                                                                                               |
| Owings et. al. (2001)[53]    | Quasi-experimental. n= 79 MW. (72±5 years).                                      | Determine if the mechanisms biomechanical that contributed to failed recoveries in the treadmill would be the same by from a trip.     | Surface-translation: the perturbation was applied by a motorized treadmill.                                                                                                                                                                      | -                                                                                                                                    | Reaction time, step length, recovery step, onset, toe-off and ground contact, step length, trunk angle at onset, toe-off and ground contact. And trunk velocity at toe-off and ground contact ( <i>Camera motion capture system and reflective markers</i> ). |
| Thelen et. al. (1997)[61]    | Quasi-experimental. n= 20; YA (24.3 mean years) and 10 OA (mean age 71.3 years). | Measure the largest forward body lean angle that could regain standing balance by taking a single, rapid step.                         | Tether-release method: the perturbation was induced by releasing the lean-control cable.                                                                                                                                                         | -                                                                                                                                    | Reaction time, transfer time, step time, step length and step velocity ( <i>Optoelectronic motion capture system and diodes markers</i> ).                                                                                                                    |
| Cronin et. al. (2013)[43]    | Quasi-experimental. n= 81 MW. (70±3 years).                                      | Compare the timing and magnitude of activation of the major leg muscles during balance recovery.                                       | Tether-release method: the perturbation was induced by the disengagement of an electromagnet.                                                                                                                                                    | Single step.<br>Multiple steps.                                                                                                      | Step length, step time, ankle and knee angle ( <i>Motion capture system, retro-reflective markers and video camera</i> ).                                                                                                                                     |
| Troy and Grabiner (2005)[62] | Quasi-experimental. n= 13 MW. (72±5 years).                                      | Examine how older adults restore dynamic equilibrium after three types of large postural disturbances.                                 | Tether-release method: the perturbation was induced by the disconnection of an electromagnet. Surface-translation the perturbation was induced by a motorized treadmill. Trip: the perturbation was induced by a pneumatically powered obstacle. | -                                                                                                                                    | Maximum step height, step length of the leading and trailing limbs, peak vertical velocity, and peak horizontal velocity of the leading and trailing feet ( <i>Reflective markers</i> ).                                                                      |
| Mille et. al. (2005) [50]    | Quasi-experimental. n=20 W; YA (24±1.4 years) and OA (73.3±6.3 years).           | Determine age-related differences in protective stepping behavior in response to lateral waist-pull perturbations of postural balance. | Waist-pull: the perturbation was applied by a motor-driven waist-pull system.                                                                                                                                                                    | Single step.<br>Multiple steps.<br>Loaded sidestep.<br>Unloaded medial step.<br>Unloaded crossover step.<br>Collisions between feet. | Number of steps, step strategies and collisions between feet. Onset and end step, step displacements, step clearance and trunk angular displacements ( <i>Camera Motion capture system and reflective markers</i> ).                                          |

|                             |                                                                            |                                                                                                                                                                              |                                                                                                                                                                                                                                                                   |                                                                                                                                                                        |                                                                                                                                                                                                                                                       |
|-----------------------------|----------------------------------------------------------------------------|------------------------------------------------------------------------------------------------------------------------------------------------------------------------------|-------------------------------------------------------------------------------------------------------------------------------------------------------------------------------------------------------------------------------------------------------------------|------------------------------------------------------------------------------------------------------------------------------------------------------------------------|-------------------------------------------------------------------------------------------------------------------------------------------------------------------------------------------------------------------------------------------------------|
| Dijkstra et. al. (2015)[44] | Quasi-experimental. n=25 MW; OA (68±7 years) and YA (28±4 years).          | Determine whether young and older adults exhibit similar improvements in compensatory stepping over repeated exposure to external perturbations.                             | Surface-translation the perturbation was induced by surface translations.                                                                                                                                                                                         | Side-step. Cross-over step.                                                                                                                                            | First step latency, first step length, number of steps and identification of lateral step strategy ( <i>Motion capture system and reflective markers</i> ).                                                                                           |
| Nagano et. al. (2015)[51]   | Quasi-experimental. n=15;(72.5±4.8 years).                                 | Understand how older adults control lower limb stepping responses to preserve balance following unanticipated forward falling.                                               | Tether-release method: the perturbation was applied by disconnection to the electromagnet system.                                                                                                                                                                 | Single-step. Multiple-steps.                                                                                                                                           | Initial reaction, foot contact, step length, step width, step velocity, COM velocity and MoS ( <i>Motion capture system, video camera, reflective markers</i> ).                                                                                      |
| Kim et. al. (2013)[47]      | Quasi-experimental. n= 41 MW; YA (22.7±3.35 years) and OA (68±7.19 years). | Assess the effects of perturbation type (MP vs LP) and advancing age on recovery step and trunk Kinematics.                                                                  | Perturbing shoes: the perturbation was applied by instrumented sandals. Each sandal has two electronically-controlled hinged flaps concealed.                                                                                                                     | -                                                                                                                                                                      | Walking speed and step width ( <i>Optoelectronic camera system and infrared-emitting diode markers</i> ).                                                                                                                                             |
| Borrelli et. al. (2019)[38] | Quasi-experimental. n= 48 MW; (72.7±5.6 years).                            | The balance stability of the different evoked first step reactions and the stability of single and multistep strategies of older adults to lateral waist-pull perturbations. | Waist-pull: the perturbation was applied by the waist-pull system. The system includes a stepper- motor driven linear drive table, cable and belt connection, in-line load cell, position transducer, floating electromechanical latch, and spring pre-tensioner. | Laterals sidestep. Unloaded sidesteps: Cross-over step to the front. Cross-over step to the back. Medial sidestep. Multiple steps. Inter-limb collisions. Single step. | MoS, step initiation and step termination step length, swing time, first step BoS-COM and COM velocity ( <i>Motion capture system and reflective markers</i> ).                                                                                       |
| Borrelli et. al. (2021)[23] | Quasi-experimental. n= 71 MW; (72.7±5.5 years).                            | Compare the space-temporal stepping parameters and MoS between a single lateral sidestep and each step of a two-step (unloaded sidesteps - followed by a                     | Waist-pull: the perturbation was applied by the waist-pull system. The system includes a stepper- motor driven linear drive table, cable and belt connection, in-line load cell, position transducer, floating                                                    | Laterals sidestep. Unloaded sidesteps: Cross-over step to the front. Cross-over step to the back. Medial sidestep.                                                     | Step unloading onset, step loading, time between limb unloading onset and loading ( <i>Motion capture system, reflective markers</i> ). COM displacement at step loading, and COM velocity at step loading ( <i>Motion capture system, reflective</i> |



|                                 |                                                                                                      |                                                                                                                                                                                                                         |                                                                                                                                                                                                                                                                                      |                                                                                                                                                   |                                                                                                                                                                                                                                                                                                                                                                                       |
|---------------------------------|------------------------------------------------------------------------------------------------------|-------------------------------------------------------------------------------------------------------------------------------------------------------------------------------------------------------------------------|--------------------------------------------------------------------------------------------------------------------------------------------------------------------------------------------------------------------------------------------------------------------------------------|---------------------------------------------------------------------------------------------------------------------------------------------------|---------------------------------------------------------------------------------------------------------------------------------------------------------------------------------------------------------------------------------------------------------------------------------------------------------------------------------------------------------------------------------------|
|                                 |                                                                                                      | lateral sidestep)<br>protective stepping<br>sequence.                                                                                                                                                                   | electromechanical latch, and<br>spring pre-tensioner.                                                                                                                                                                                                                                | Multiple steps.<br>Inter-limb collisions.<br>Single step.<br>Single lateral sidestep.<br>Unloaded sidesteps<br>followed by a lateral<br>sidestep. | <i>markers</i> ). Lift-off and touch down ( <i>Force<br/>platform</i> ).                                                                                                                                                                                                                                                                                                              |
| Shulman et.<br>al. (2019)[59]   | Quasi-experimental.<br>n= 34 MW; OA<br>(75.6±5.3 years) and<br>YA (21.7±2.6 years).                  | Discern age related<br>alterations in proactive<br>and reactive Dynamic<br>postural control of gait<br>initiation.                                                                                                      | Perturbations of the support<br>surface: the perturbation was<br>applied by force plates. The<br>force platform was mounted on<br>top of a custom robotic<br>platform.                                                                                                               | -                                                                                                                                                 | Toe-off, heel contact, step length, step<br>width, step time and whole-body COM<br>velocity ( <i>Camera motion capture system<br/>and reflective markers</i> ).                                                                                                                                                                                                                       |
| Allin et. al.<br>(2020)[70]     | Randomized<br>controlled trial.<br>n= 34 MW; (age range<br>61-75 years).                             | Evaluate the effects of<br>perturbation-based<br>balance training targeting<br>slipping and tripping on<br>laboratory induced slips<br>and trips.                                                                       | Slip: the perturbation was<br>induced by spreading a thin<br>layer of vegetable oil over a<br>section of the walkway. Trip:<br>the perturbations was induced<br>using a tripping obstacle that<br>was initially concealed and level<br>with the walkway.                             | <i>Trip</i><br>Elevating strategy.<br>Lowering strategy.                                                                                          | Gait speed, step length and minimum<br>toe clearance. <i>Slip and trip</i> : onset,<br>touchdown, minimum hip height and<br>MoS at touchdown. Slip: slip end, peak<br>slip speed, distance and COM velocity<br>relative. Trip: trunk angle at<br>touchdown, recovery step length and<br>stepping strategy ( <i>Camera motion<br/>capture system and reflective markers</i> ).         |
| Graham et.<br>al. (2014)[46]    | Quasi-experimental.<br>n= 15 M; OA (70±3.9<br>years) and YA (34±2.6<br>years).                       | Determine the muscular<br>contributions to the<br>stepping phase of<br>recovery from forward<br>loss of balance with a<br>single step, and multiple<br>steps.                                                           | Tether-release method: the<br>perturbation was applied<br>through the disengagement of<br>an electromagnet located in-<br>series with the cable.                                                                                                                                     | Single steps.<br>Multiple steps.                                                                                                                  | Step length, step time, toe-off, mind<br>swing foot contact and reaction force<br>( <i>Motion capture system, reflective markers</i> )                                                                                                                                                                                                                                                |
| Mansfield et.<br>al. (2009)[49] | Quasi-experimental.<br>n= 40 MW; YA (age<br>range 22-28 years)<br>and OA (age range<br>64-79 years). | Determine if previously<br>reported age-related<br>differences in change-in-<br>support reactions are<br>dependent on<br>perturbation method,<br>under conditions where<br>other confounding factors<br>are controlled. | Surface-translation: the<br>perturbations were delivered<br>via rapid horizontal translation<br>of the computer-controlled<br>motor-driven motion platform.<br>Cable-pull/ Waist-pull: the<br>perturbations were applied by<br>dropping a weight of subject,<br>using a computer and | -                                                                                                                                                 | <i>Step reaction</i> : frequency of multiple-step<br>reactions, stepping pattern, frequency<br>lateral step and collisions between the<br>swing and stance limbs ( <i>Motion capture<br/>system and reflective markers</i> ). <i>Initial step</i> :<br>onset, foot-off, foot contact, step length,<br>and swing duration ( <i>Motion capture<br/>system and reflective markers</i> ). |

|                               |                                                                                                                                        |                                                                                                                                                                |                                                                                                                               |                                             |                                                                                                                                                                                                                                |
|-------------------------------|----------------------------------------------------------------------------------------------------------------------------------------|----------------------------------------------------------------------------------------------------------------------------------------------------------------|-------------------------------------------------------------------------------------------------------------------------------|---------------------------------------------|--------------------------------------------------------------------------------------------------------------------------------------------------------------------------------------------------------------------------------|
|                               |                                                                                                                                        |                                                                                                                                                                | electromagnet to control the timing of the drop.                                                                              |                                             |                                                                                                                                                                                                                                |
| Lee et. al. (2014)[26]        | Quasi-experimental. n= 26; YA (two groups (26.5±3.4 years) - (25.3±4.6 years)) and OA (two groups (69.2±10.2 years) - (71±6.7 years)). | Examined forwards stepping despite considerable bio-mechanical and visual differences between the forwards and backwards directions                            | Surface-translation: the perturbation was applied by a motorized computer-controlled platform.                                | -                                           | Step length, foot lift-off and landing step ( <i>Platform conductive strips</i> ). Step reaction time and angular velocity step ( <i>Gyroscopes and force platform</i> ).                                                      |
| Aprigliano et. al. (2017)[36] | Quasi-experimental. n= 20; YA (24.4±2.5 years) and OA (66.3±5.1 years).                                                                | Verify whether aging modifies the intralimb coordination underlying corrective responses induced by unexpected perturbations.                                  | : the perturbation was applied by a split-belt treadmill whose belts can be independently controlled the perturbations.       | -                                           | Duration of the stride and stance phase, step length, and width step. ( <i>Motion capture system and reflective markers</i> )                                                                                                  |
| Nnodim et. al. (2016)[31]     | Quasi-experimental. n=8 MW; (72±6.4 years).                                                                                            | Identify if there are interference between the motor and the cognitive after a gait-destabilizing perturbation.                                                | Perturbing shoes: the perturbation was applied by an instrumented shoe. The footwear has two retractable connected a program. | -                                           | Gait sped, step width, step length and step time ( <i>Motion capture system and diode markers</i> )                                                                                                                            |
| Chen et. al. (1994)[21]       | Quasi-experimental. n= 48 MW; YA (mean age 23.4 years) and OA (mean age 72.8 years).                                                   | Test that neither age, gender, nor available response times affect the strategies used to step over an obstacle appearing with short available response times. | Trip: the perturbation was applied by a virtual obstacle with a light projected onto the 8m walkway.                          | Short step strategy.<br>Long step strategy. | Pre crossing obstacle and crossing obstacle: step length, step time. Post crossing obstacle: toe distance and heel distance. Step strategy: Number of steps deliberate ( <i>Walkway with conducting surface and computer</i> ) |
| Bianca Te et. al. (2023) [77] | Observational. n= 515 OA (mean age 82.7 years)                                                                                         | Determine the relative importance of falls an absence of stepping responses, versus steps that were inappropriate in size or direction.                        | Analyzed video footage of falls experienced by residents.                                                                     | Multiple steps.                             | Number of steps, direction of the steps, length of the first and second sept. ( <i>Digital video cameras</i> )                                                                                                                 |
| Wang S. et. al. (2023) [69]   | Quasi-experimental. n=298 OA (69.6±6.33 years)                                                                                         | Develop prediction models to predict trip-related fallers with different recovery                                                                              | Trip: the perturbations was induced by an obstacle device which consisted of a hinged metal plate and a pair of               | Lowering strategy.<br>Elevating strategy.   | <i>Gait</i> : gait speed, trunk angle, COM state, step length, gait duration, toe clearance, swing time, and step time. <i>Joint kinematics</i> : hip angle, knee angle, and foot angle for both limbs                         |

|                             |                                               | strategies using machine-learning methods                                                                                  | electromagnets. Walking in a walkway 7 meters.                                                                          |                                                                                                    | <i>(Motion capture system and reflective markers)</i> |
|-----------------------------|-----------------------------------------------|----------------------------------------------------------------------------------------------------------------------------|-------------------------------------------------------------------------------------------------------------------------|----------------------------------------------------------------------------------------------------|-------------------------------------------------------|
| Tashiro et. al. (2021) [70] | Quasi-experimental. n=W; OA (77.8±6.9 years). | Determine the relationship between protective lateral stepping ability and FOF among older community-dwelling individuals. | Tether-release method: the perturbation was applied through a cable was released suddenly after a random delay ranging. | Single-step.<br>Multiple stepping.<br>Lateral steppers.<br>Crossover steppers.<br>Medial steppers. | Types of steps.<br><i>(observation)</i>               |

Design Research and Population: (Mean ± Standard Deviation); Men (M); Women (W); Men and Women (MW) Youngers Adults (YA) and Older Adults (OA). Variables and Measuring Instrument: Margin of Stability (MoS); Center of Mass (COM) and Base of Support (BoS).
